# Supplementary material for: Characterization of Early Life Stress-Affected Gut Microbiota
Source: MDPI journal article supplement (doi:10.3390/brainsci11070913), 2021-07-10
Supplement: s1 [file s1]

Supplementary Materials

# Characterization of early life stress-affected gut microbiota

Noriyoshi Usui, Hideo Matsuzaki and Shoichi Shimada

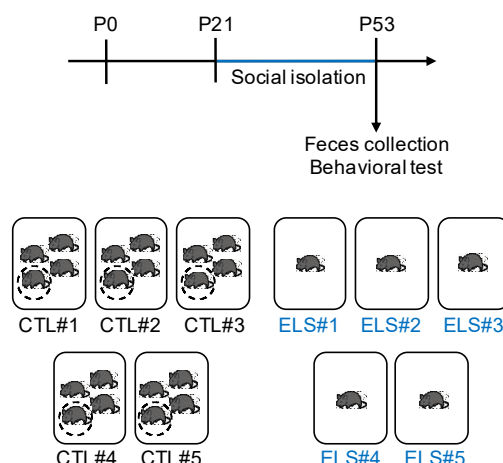

**Figure S1.** Schematic diagram of experimental design. For ELS mice, male mice were individually housed immediately after the weaning at postnatal days 21 until P53. For control mice, 4 male mice were co-housed in the same cage after the weaning at P21. One mouse from a cage was randomly selected for behavioral test. In total, 25 male mice were used for this study. Fecal samples were collected at P53 before three-chamber social interaction test. Feces from a one cage were counted as a one biological sample, thus 5 cages/condition were used. *CTL*, control mice; *ELS*, early life stressed mice.

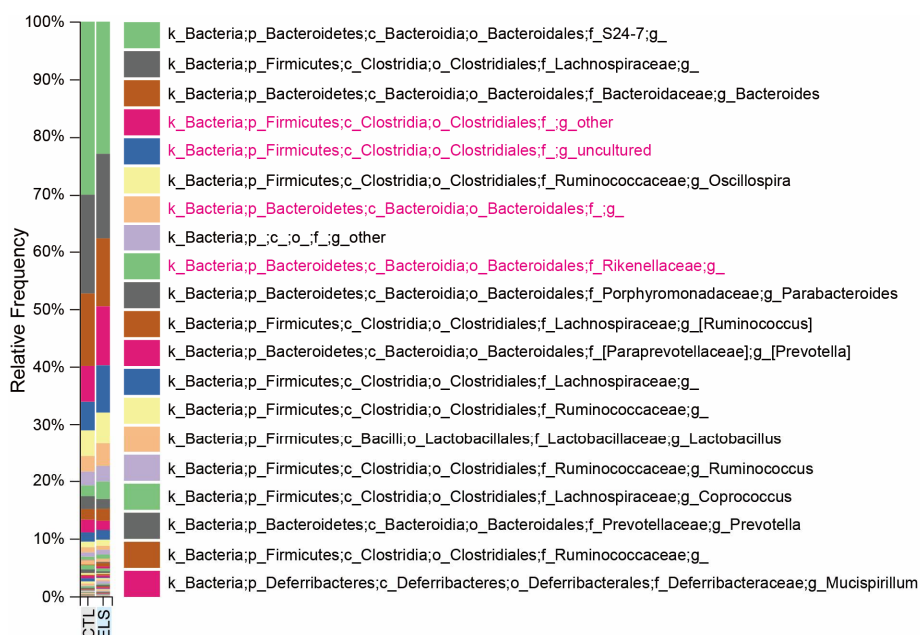

**Figure S2.** Early life stress induced alteration of gut microbiota composition. The top 20 relative abundant taxa were shown at genus level in intergroup comparative analysis. *CTL*, control mice; *ELS*, early life stressed mice, n =5/condition.

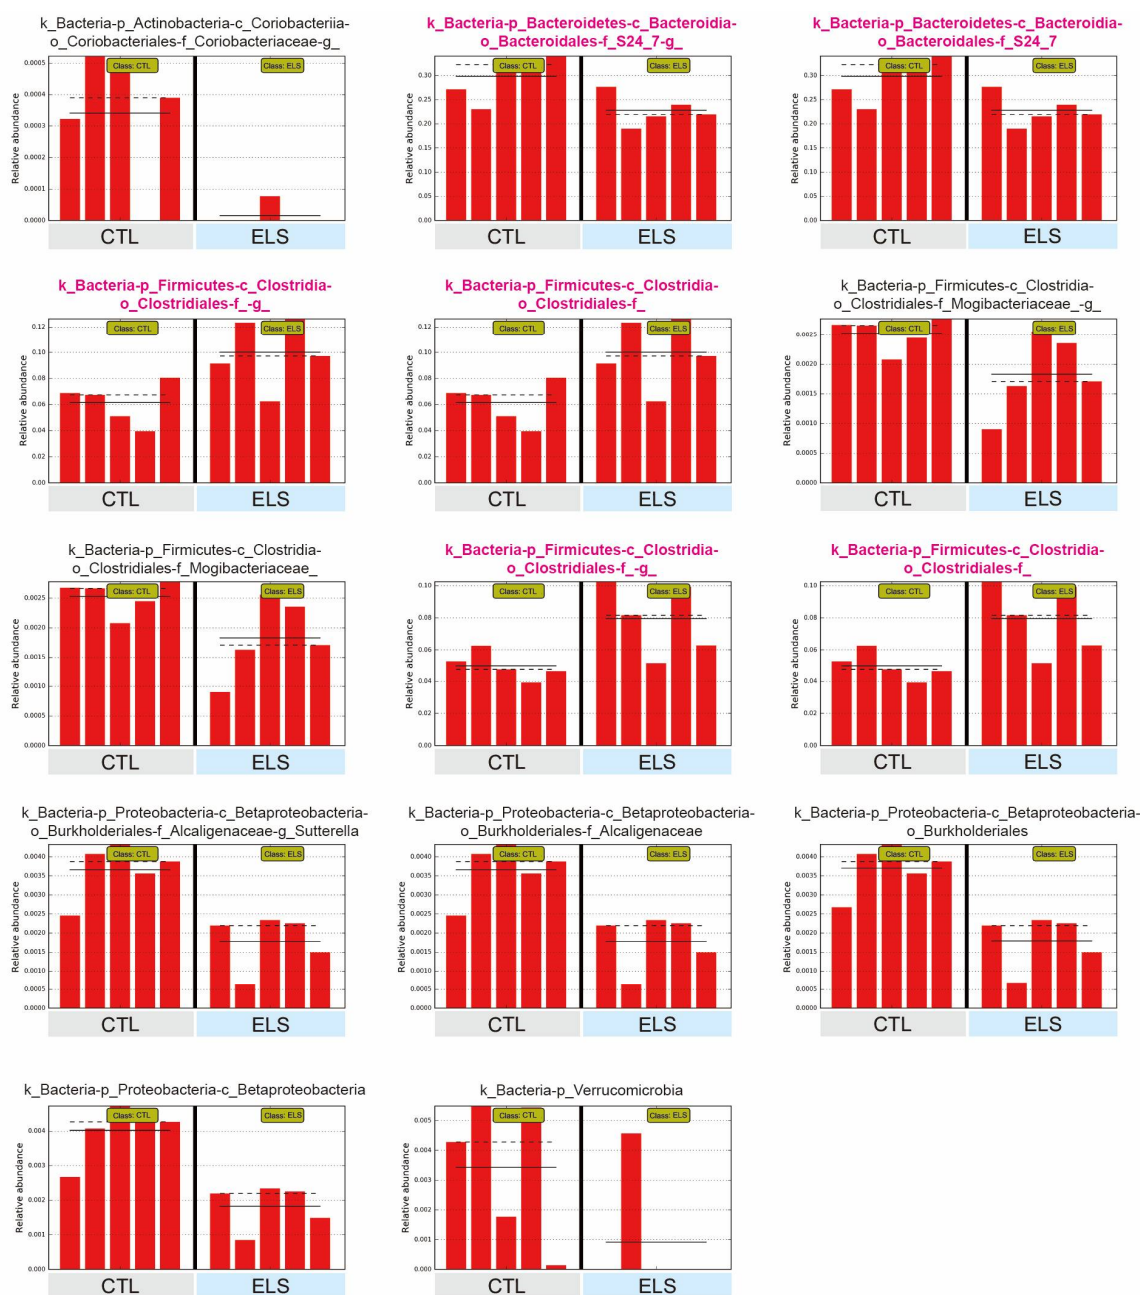

**Figure S3.** Each histogram showing relative taxonomic abundances at genus level by LEfSe (see also Figure 2). Significant altered gut bacteria in 16S rRNA-seq were shown in magenta. CTL, control mice; ELS, early life stressed mice, n=5/condition.
